# Supplementary material for: Label-free and reagent-less electrochemical detection of nucleocapsid protein of SARS-CoV-2: an ultrasensitive and disposable biosensor
Source: Royal Society of Chemistry journal article supplement (doi:10.1039/d2nj00046f), 2022-01-01
Supplement: d2nj00046f1.pdf [file d2nj00046f1.pdf]

Electronic Supplementary Information

**Label-Free and Reagentless Electrochemical detection of nucleocapsid protein  
of SARS-CoV-2: An ultrasensitive and Disposable Biosensor**

**Elif Burcu Aydın<sup>a</sup>, Muhammet Aydın<sup>a</sup>, Mustafa Kemal Sezgintürk<sup>b\*</sup>**

**<sup>a</sup>Tekirdağ Namık Kemal University, Scientific and Technological Research Center, Tekirdağ-  
TURKEY**

**<sup>b</sup>Çanakkale Onsekiz Mart University, Faculty of Engineering, Bioengineering Department,  
Çanakkale-TURKEY**

**\*Corresponding Author:**

**e-mail:** msezginturk@hotmail.com

## 1. Materials and Methods

### 1.1 Materials and Reagents

3-Thiophenecarboxaldehyde (*Thi-Ald*) (98%, CAS Number: 498-62-4), gold (III) chloride trihydrate ( $\text{HAuCl}_4 \cdot 3\text{H}_2\text{O}$ ) ( $\geq 99.9\%$ , CAS Number: 16961-25-4), potassium ferrocyanide ( $\text{K}_4[\text{Fe}(\text{CN})_6] \cdot 3\text{H}_2\text{O}$ ) ( $\geq 99.5\%$ , CAS Number: 14459-95-1), potassium ferricyanide ( $\text{K}_3[\text{Fe}(\text{CN})_6]$ ) ( $\geq 99.0\%$ , CAS Number: 13746-66-2), Potassium phosphate dibasic ( $\text{K}_2\text{HPO}_4$ ) ( $\geq 98\%$ , CAS Number: 7758-11-4), potassium phosphate monobasic ( $\text{KH}_2\text{PO}_4$ ), ( $\geq 99.0\%$ , CAS Number: 7778-77-0), potassium chloride (KCl), ( $\geq 99.0\%$ , CAS Number: 7447-40-7), bovine serum albumin (BSA) ( $\geq 98.0\%$ , CAS Number: 9048-46-8), SARS-CoV-2 spike RBD (expressed in HEK 293 cells), anti-COVID 19 nucleocapsid coronavirus monoclonal antibody (produced in rabbit), COVID 19 nucleocapsid coronavirus recombinant protein, IgG from rabbit serum, anti-rabbit immunoglobulin G (IgG antibody produced in goat), COVID 19 spike RBD coronavirus recombinant protein (HEK293 cells), interleukin 1 $\beta$  (human recombinant), interleukin 8 (human) and tumor Necrosis Factor- $\alpha$  Protein (recombinant human) were obtained from Sigma-Aldrich. During the fabrication process of the biosensor, ultrapure water (18M $\Omega$ cm), which was purified by Millipore Q system was utilized. All protein solutions were prepared by using phosphate buffer solutions (PBS, prepared  $\text{KH}_2\text{PO}_4$  and  $\text{K}_2\text{HPO}_4$ , pH: 7.4) and were kept in a refrigerator at -20 °C.

### 1.2 Instruments

#### **Potentiostat / Galvanostat**

The electrochemical characterization of the proposed immunosensor fabrication procedure, EIS and CV analyses were performed after each modification step. A three-electrode system was utilized with ITO substrate as the working electrode (5 x 20 mm), Pt wire as the auxiliary electrode and Ag/AgCl as the reference electrode. The electrolyte solution utilized in all the electrochemical analyses contained 1 M KCl and 5 mM  $\text{K}_3\text{Fe}(\text{CN})_6/\text{K}_4\text{Fe}(\text{CN})_6$  (1:1), in which  $[\text{Fe}(\text{CN})_6]^{4-/3-}$  was used as the redox couple. The alternating potential and formal potential applied during EIS measurements were 5 mV and 0 V, respectively. The EIS measurements were performed in the frequency range of 0.5 Hz–50 kHz. A Randles equivalent circuit was utilized to fit the obtained EIS spectra. The potentials of CV were set from -0.5 to 1 V at a scan rate of 100 mV/s.

#### **Fourier transform-infrared spectroscopy (FT-IR)**

The FTIR characterization of functionalized electrode surface was taken on a Bruker Company Vertex 70 spectrometer using ATR apparatus. A normal scanning range of 400–4000  $\text{cm}^{-1}$  was utilized for 24 repeated scans at a spectral resolution of 4  $\text{cm}^{-1}$ . The spectra were recorded in transmittance mode.

#### **Scanning electron microscopy (SEM)**

The surface morphology of functionalized ITO electrodes surfaces was investigated by Field Emission Scanning Electron Microscopy (SEM) (FE-SEM, QUANTA FEG-250). SEM instruments were operated with low vacuum detector (LFD) at an accelerated voltage at 5 kV.

#### **Energy dispersive analysis of X-ray (EDAX)**

The distribution of AuNPs on the electrode surface were characterized by energy dispersive X-ray elemental mapping analysis. To perform EDX analysis, the acceleration voltage and spot size were chosen as 30 kV and 5.5, respectively.

**Table SI-1.** The fitted EIS spectra results of electrode modification steps (A) and nucleocapsid antigen immobilized electrodes (B).

| (A) Biosensor Surface                             | $R_{ct}$ (kohm) | (B) Biosensor Surface                                              | $R_{ct}$ (kohm) |
|---------------------------------------------------|-----------------|--------------------------------------------------------------------|-----------------|
| ITO-AuNPs                                         | 0.205           | ITO-AuNPs/Pthi-Ald/anti-NC/BSA/NC/Ab <sub>2</sub><br>(0.0015pg/mL) | 1.697           |
| ITO-AuNPs/Pthi-Ald                                | 0.843           | ITO-AuNPs/Pthi-Ald/anti-NC/BSA/NC/Ab <sub>2</sub> (0.015pg/mL)     | 1.773           |
| ITO-AuNPs/Pthi-Ald/anti-NC                        | 1.458           | ITO-AuNPs/Pthi-Ald/anti-NC/BSA/NC/Ab <sub>2</sub> (1 pg/mL)        | 1.848           |
| ITO-AuNPs/Pthi-Ald/anti-NC/BSA                    | 1.572           | ITO-AuNPs/Pthi-Ald/anti-NC/BSA/NC/Ab <sub>2</sub> (5 pg/mL)        | 2.053           |
| ITO-AuNPs/Pthi-Ald/anti-NC/BSA/NC                 | 2.294           | ITO-AuNPs/Pthi-Ald/anti-NC/BSA/NC/Ab <sub>2</sub> (25 pg/mL)       | 2.386           |
| ITO-AuNPs/Pthi-Ald/anti-NC/BSA/NC/Ab <sub>2</sub> | 3.228           | ITO-AuNPs/Pthi-Ald/anti-NC/BSA/NC/Ab <sub>2</sub> (50 pg/mL)       | 3.228           |
| -                                                 | -               | ITO-AuNPs/Pthi-Ald/anti-NC/BSA/NC/Ab <sub>2</sub> (100 pg/mL)      | 5.485           |
| -                                                 | -               | ITO-AuNPs/Pthi-Ald/anti-NC/BSA/NC/Ab <sub>2</sub> (150 pg/mL)      | 7.381           |

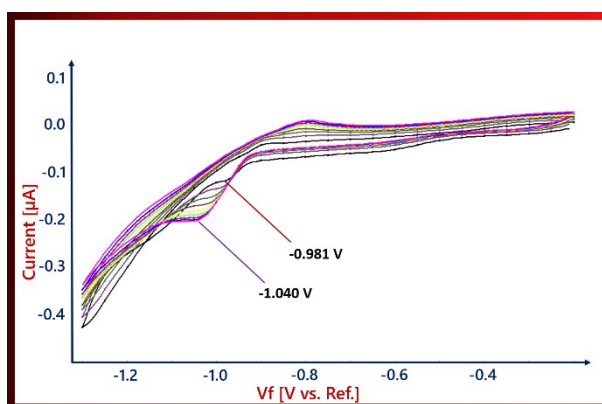

**Figure SI-1.** AuNPs deposition cyclic voltammograms.

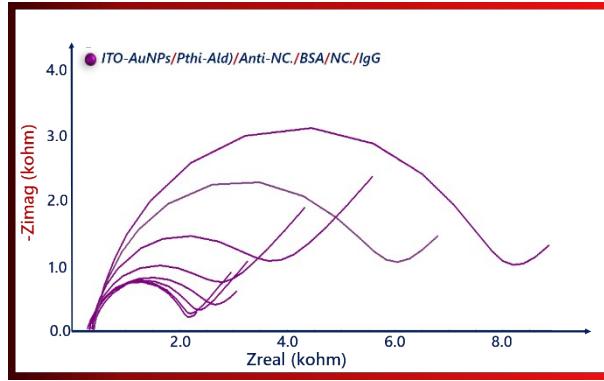

Figure SI-2. Fitted EIS spectra obtain after incubation in increasing concentrations of nucleocapsid antigen.

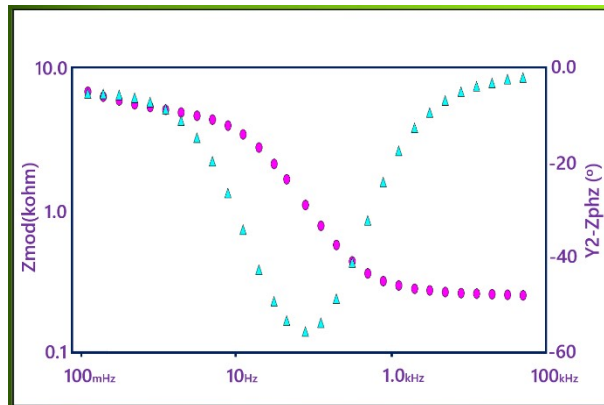

Figure SI-3. Bode plot.
